# Supplementary material for: Synthesis and Anti-Tuberculosis Activity of the Marine Natural Product Caulerpin and Its Analogues
Source: Mar Drugs. 2014 Mar 27;12(4):1757–72. doi: 10.3390/md12041757 (PMC4012461; doi:10.3390/md12041757)

## Supplementary Information

**Scheme S1.** Optimization of the reaction conditions for the synthesis of **1a**.

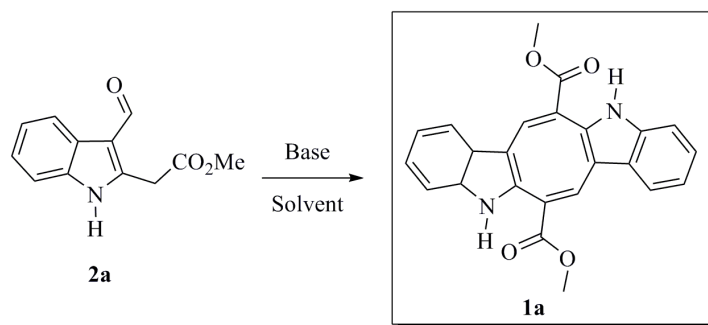

**Table S1.** Optimization of the reaction conditions for the synthesis of **1a**.

| Entry | Base                       | Concentration (M) | Solvent  | Temperature (°C) | Time (h) | Yield (%)      |
|-------|----------------------------|-------------------|----------|------------------|----------|----------------|
| 1     | Diethylamine<br>Piperidine | 0.01              | Methanol | reflux           | 48       | 2 <sup>9</sup> |
| 2     | Diethylamine<br>Piperidine | 0.01              | Xylene   | reflux           | 3        | 12             |
| 3     | Diethylamine<br>Piperidine | 0.023             | Xylene   | reflux           | 3        | 32             |
| 4     | Diethylamine<br>Piperidine | 0.038             | Xylene   | reflux           | 3        | 31             |
| 5     | Diethylamine<br>Piperidine | 0.076             | Xylene   | reflux           | 4        | 32             |
| 6     | Diethylamine<br>Piperidine | 0.230             | Xylene   | reflux           | 6        | 15             |
| 7     | Diethylamine<br>Piperidine | 0.076             | Toluene  | reflux           | 4.5      | 24             |
| 8     | Diethylamine<br>Piperidine | 0.230             | Toluene  | reflux           | 7.5      | 12             |

## Anti-Tuberculosis Activity

**Figure S1.** IC<sub>50</sub> values of compounds **1a**, **1b**, **1d** and **1e** against the *M. tuberculosis* strain H37Rv. Values are the means  $\pm$  S.E.M.,  $n = 5$ .

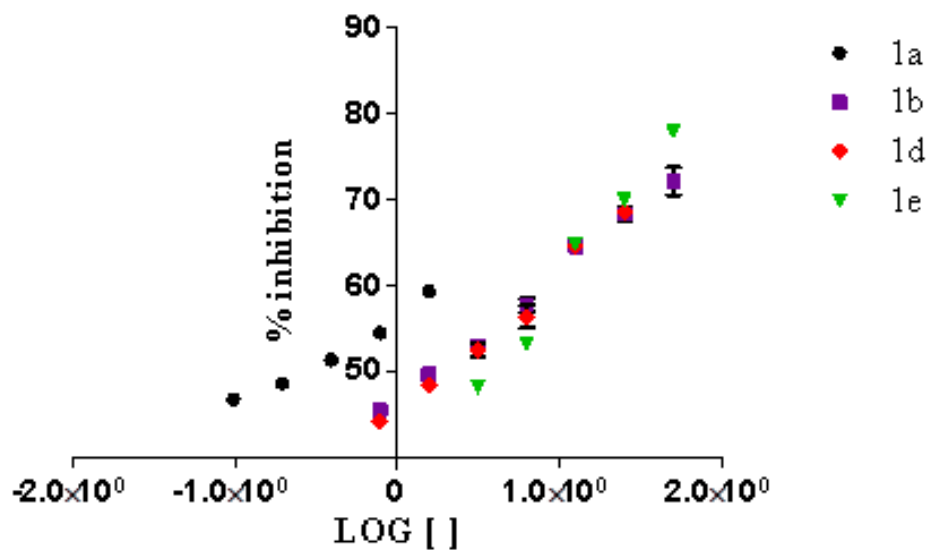

**Figure S2.** Concentration-response curve of compound **1a** against the *M. tuberculosis* strain H37Rv. This compound was tested at a concentration of 50–1.56  $\mu$ M. Values are the means  $\pm$  S.E.M.,  $n = 5$ .

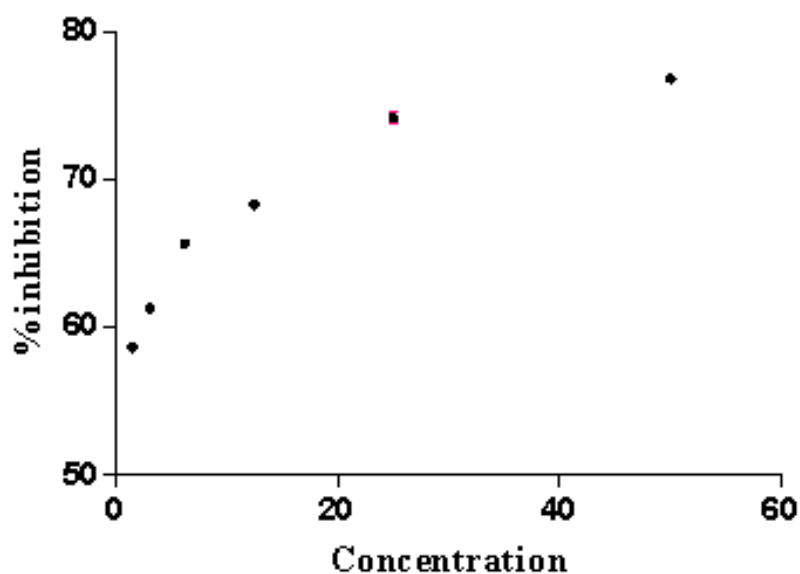

**Figure S3.** IC<sub>50</sub> values of rifampin against the *M. tuberculosis* strain H37Rv. Values are the means  $\pm$  S.E.M.,  $n = 5$ .

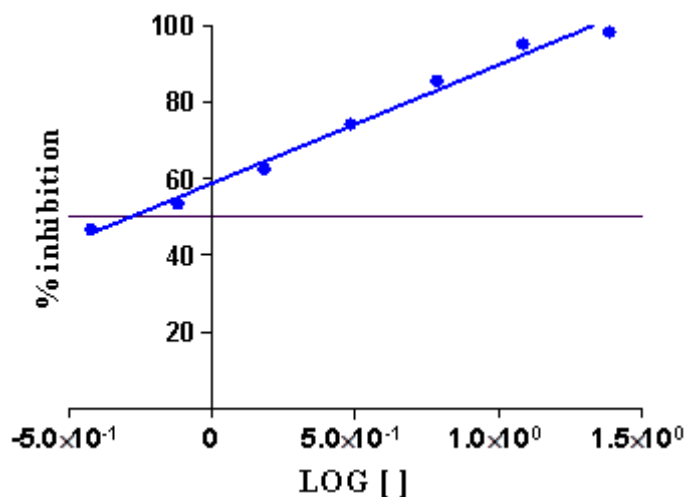

**Figure S4.** <sup>1</sup>H NMR spectrum of the Caulerpin (**1a**).

Caulerpin 1H NMR (300 MHz, CDCl<sub>3</sub> + DMSO-d<sub>6</sub>)

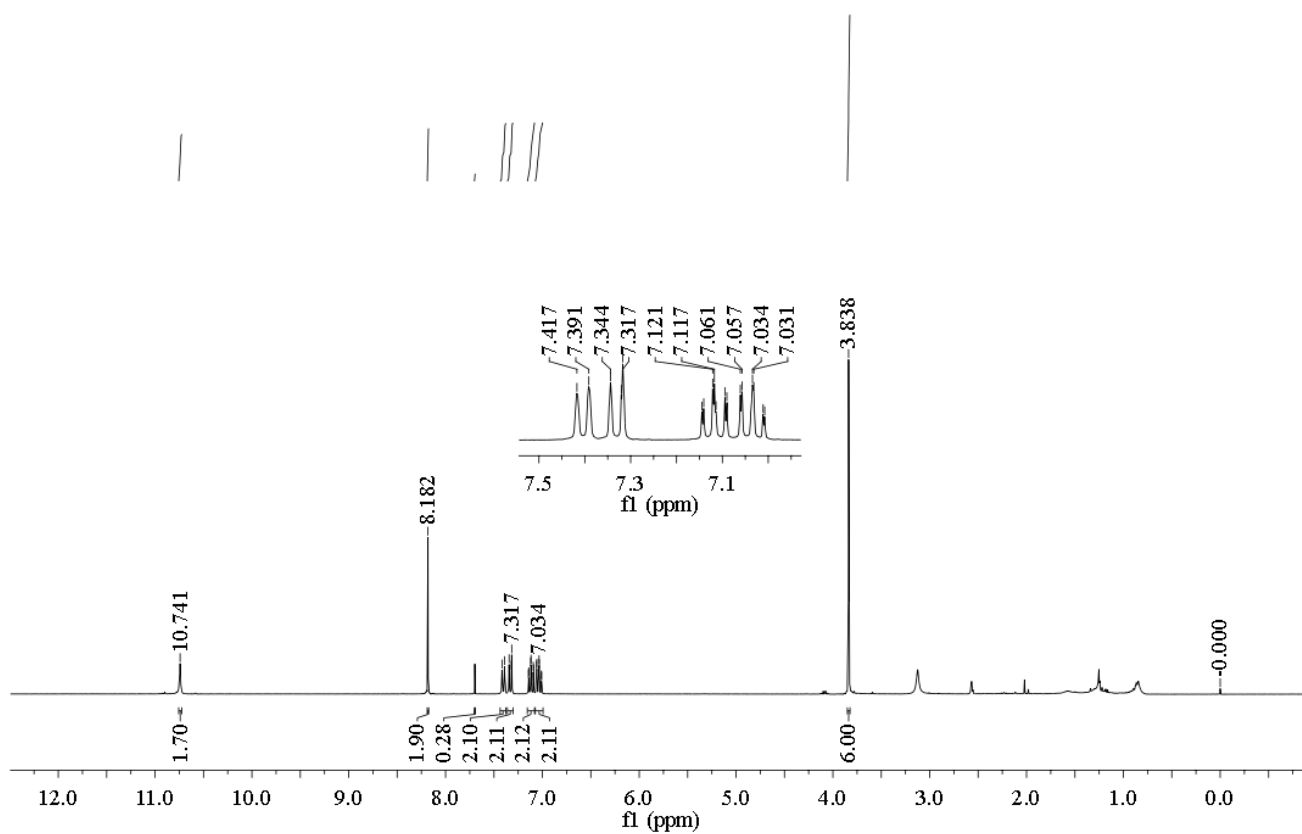

**Figure S5.**  $^{13}\text{C}$  NMR spectrum of the Caulerpin (**1a**).Caulerpin  $^{13}\text{C}$  NMR (300 MHz,  $\text{CDCl}_3 + \text{DMSO-d}_6$ )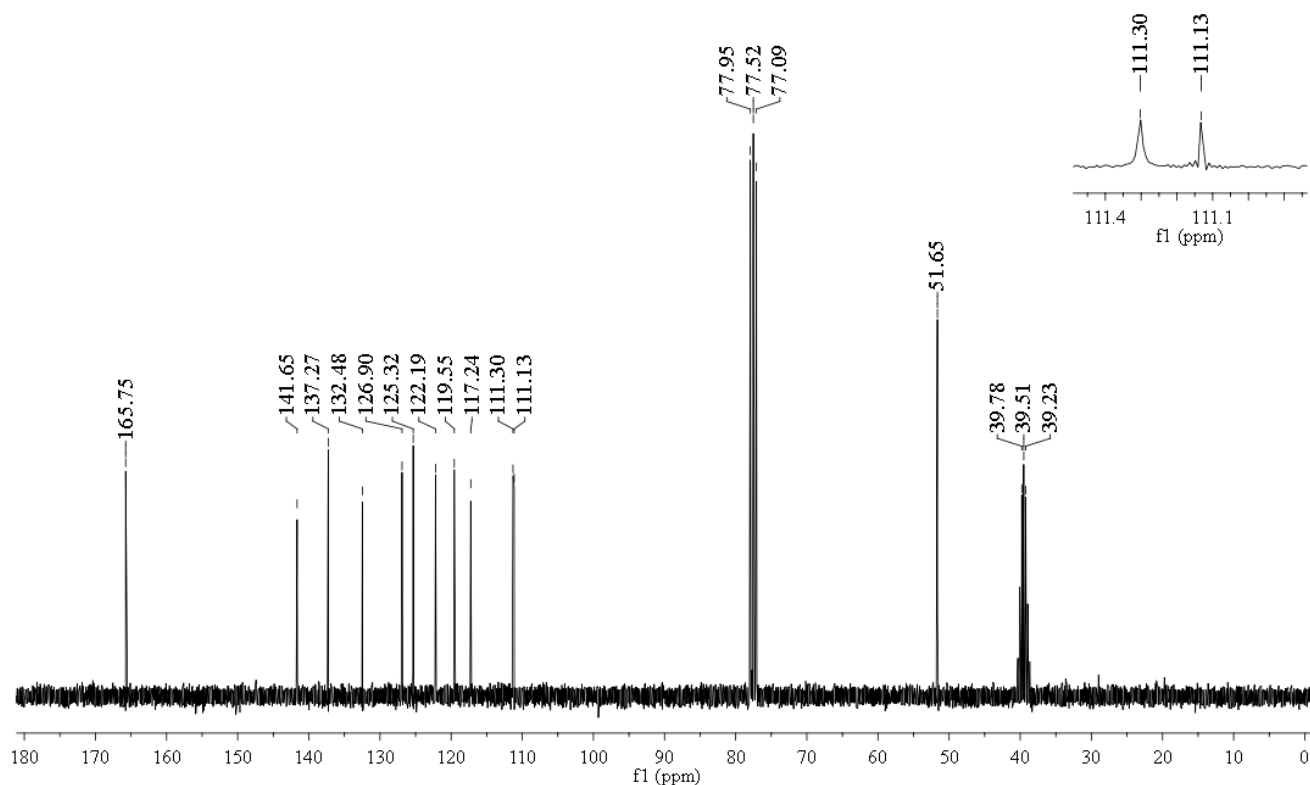**Figure S6.** Elemental composition of the Caulerpin (**1a**).

[ Elemental Composition ]  
 Data : Dr-Roberto-Martinez003 Date : 02-Dec-2013 13:24 Page: 1  
 Sample: 2616 **1a**  
 Note : -luis-velasco  
 Inlet : Direct Ion Mode : FAB+  
 RT : 1.04 min Scan#: (2,7)  
 Elements : C 40/0, H 49/0, O 5/0, N 3/1  
 Mass Tolerance : 1000ppm, 1mmu if m/z > 1  
 Unsaturation (U.S.) : -0.5 - 20.0

| Observed m/z | Int%  | Estimated m/z | Error [ppm] | U.S. | C  | H  | O | N |
|--------------|-------|---------------|-------------|------|----|----|---|---|
| 398.1266     | 100.0 | 398.1267      | -0.3        | 17.0 | 24 | 18 | 4 | 2 |

**Figure S7.** Mass spectrum of the Caulerpin (**1a**).**Caulerpin, 1a**

[ Mass Spectrum ]  
Date : Dr-Martinez-Roberto-071 Date : 30-Jun-2011 17:25  
Sample: 1626 JeolFXS65HA  
Note : Javier Perez  
Inlet : Direct Ion Mode : EI+  
Spectrum Type : Normal Ion (MF-Linear)  
RT : 0.16 min Scan# : (5,8)  
BP : m/z 398.0000 Int. : 44.91  
Output m/z range : 11.0694 to 435.6083 Cut Level : 0.00 %

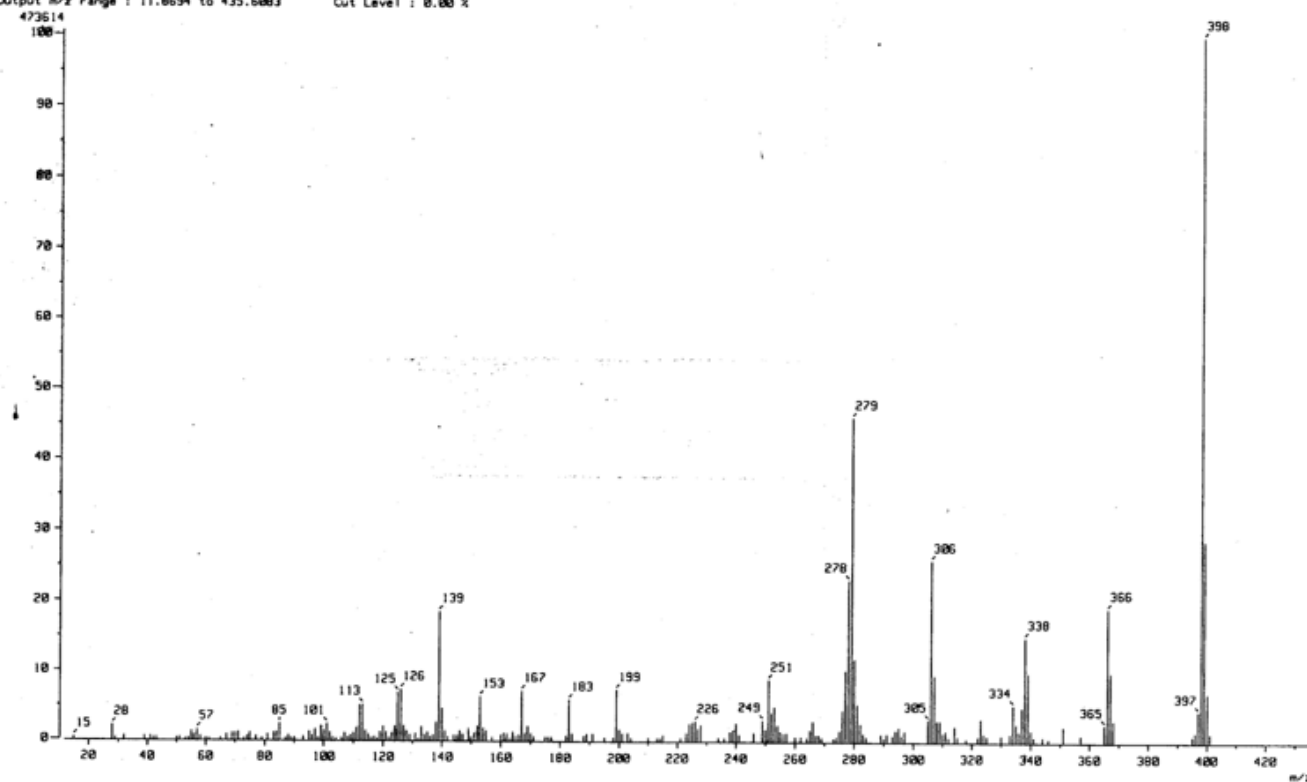

**Figure S8.**  $^1\text{H}$  NMR spectrum of diethyl 2-(3-formyl-1*H*-indol-2-yl)malonate (**6a**).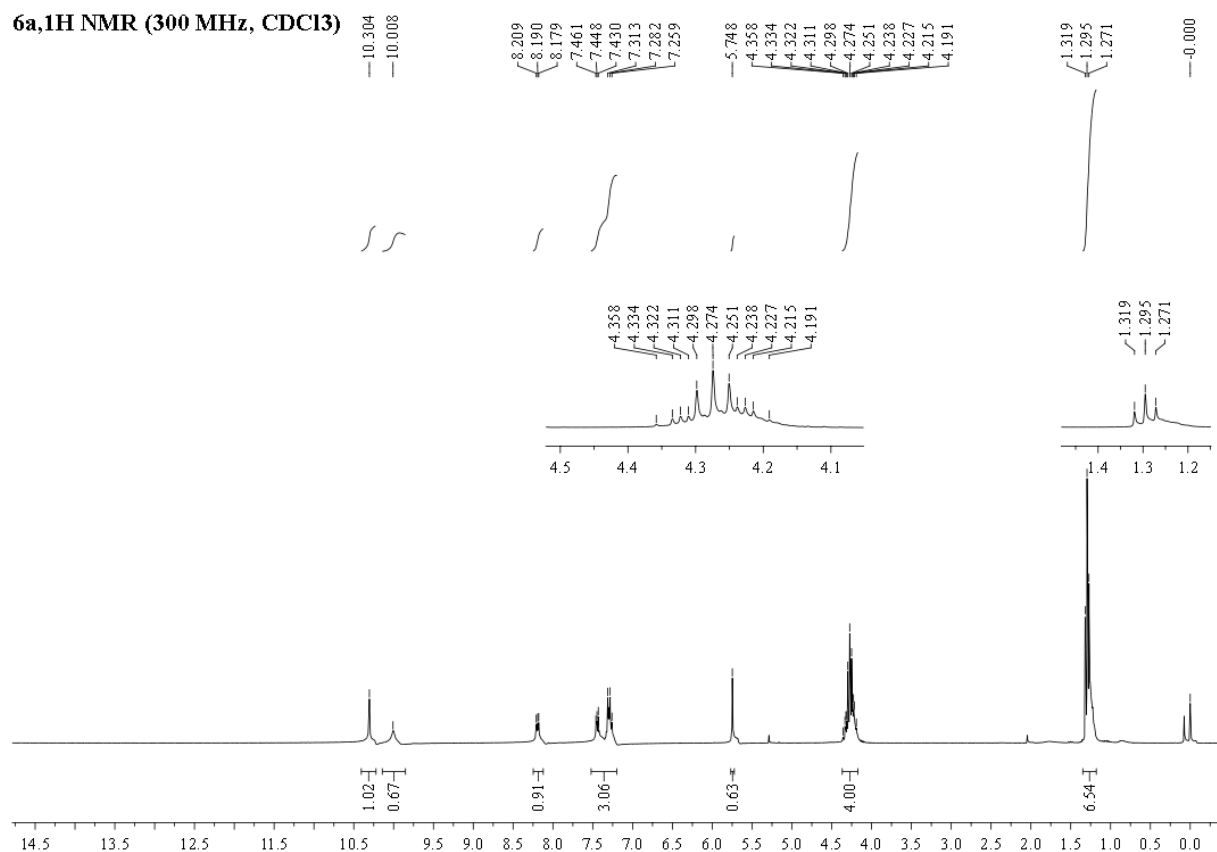**Figure S9.**  $^{13}\text{C}$  NMR spectrum of diethyl 2-(3-formyl-1*H*-indol-2-yl)malonate (**6a**).

**6a,  $^{13}\text{C}$  NMR (75 MHz,  $\text{CDCl}_3$ )**

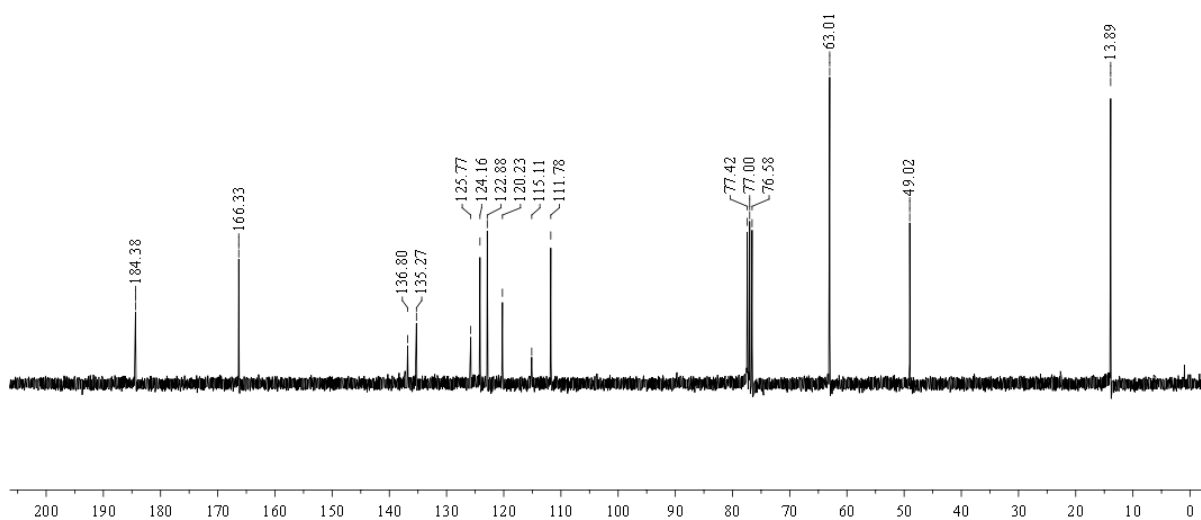

**Figure S10.** Mass spectrum of diethyl 2-(3-formyl-1*H*-indol-2-yl)malonate (**6a**).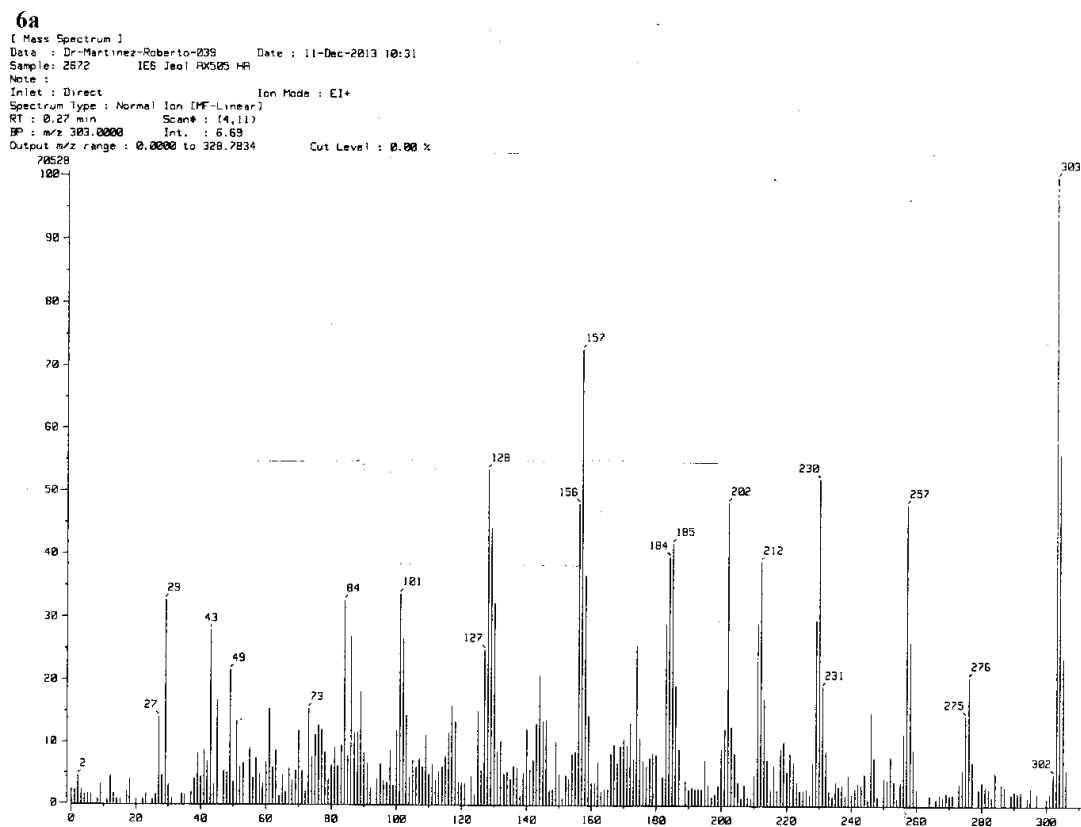**Figure S11.** <sup>1</sup>H NMR spectrum of dimethyl 2,9-dimethyl-5,12-dihydrocycloocta [1,2-*b*:5,6-*b'*]-diindole-6,13-dicarboxylate (**1f**).

**1f**, <sup>1</sup>H NMR (300 MHz, CDCl<sub>3</sub> + DMSO-*d*<sub>6</sub>)

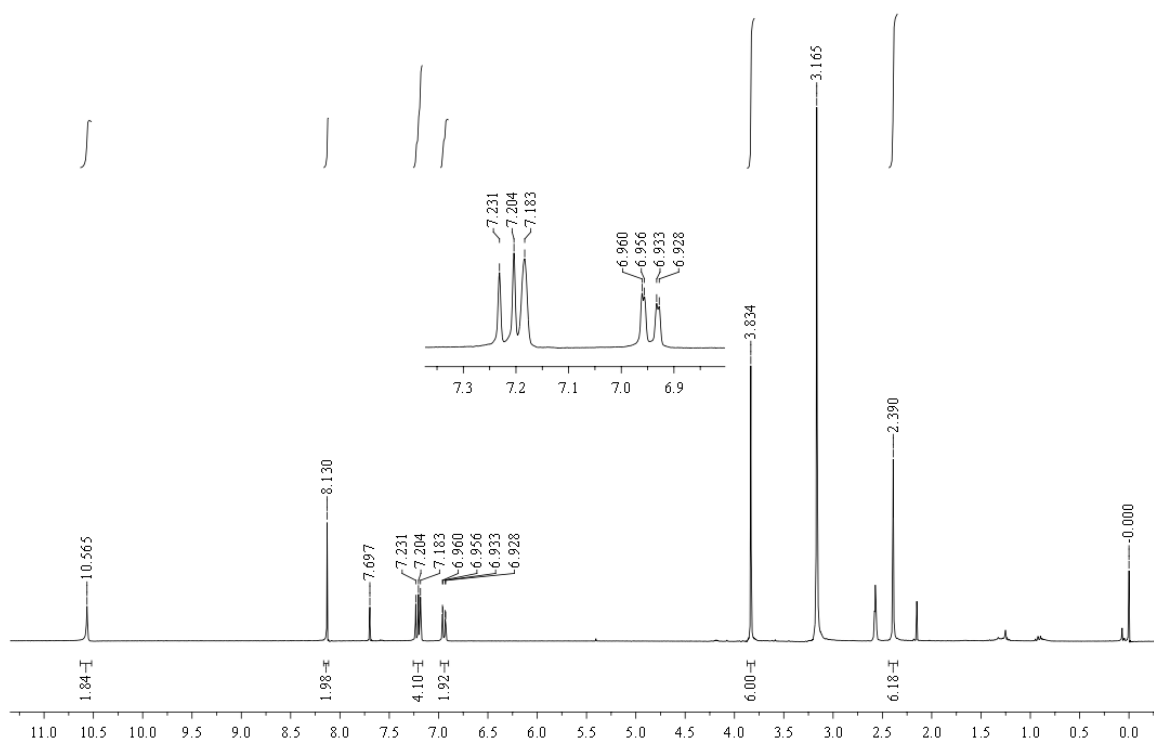

**Figure S12.**  $^{13}\text{C}$  NMR spectrum of dimethyl 2,9-dimethyl-5,12-dihydrocycloocta [1,2-*b*:5,6-*b'*]-diindole-6,13-dicarboxylate (**1f**).

**1f**,  $^{13}\text{C}$  NMR (75 MHz,  $\text{CDCl}_3 + \text{DMSO}-d_6$ )

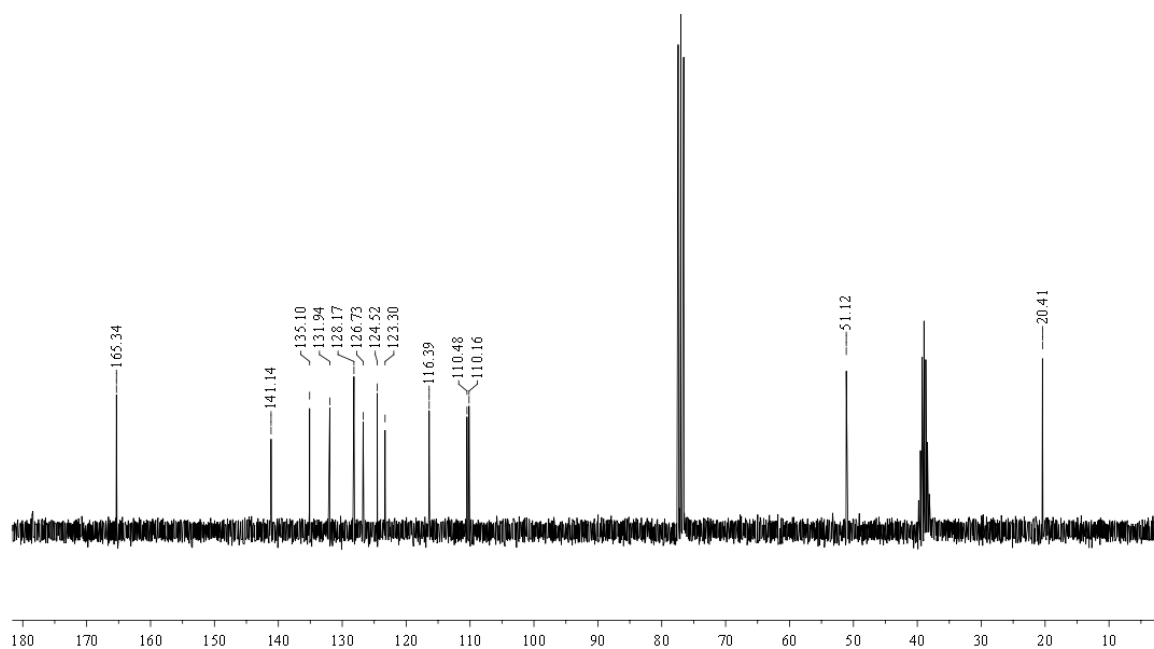

**Figure S13.** Mass spectrum of dimethyl 2,9-dimethyl-5,12-dihydrocycloocta [1,2-*b*:5,6-*b'*]-diindole-6,13-dicarboxylate (**1f**).

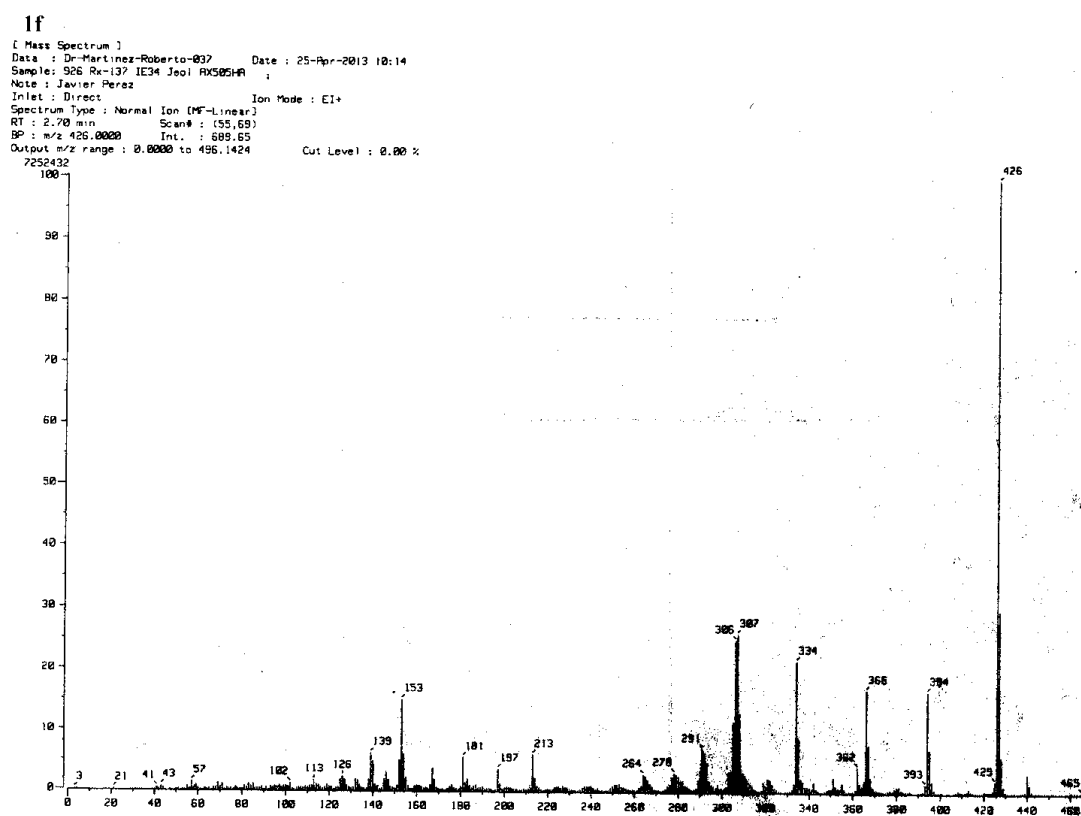

**Figure S14.** Elemental composition of dimethyl 2,9-dimethyl-5,12-dihydrocycloocta [1,2-*b*:5,6-*b'*]-diindole-6,13-dicarboxylate (**1f**).

**1f**

[ Elemental Composition ]

Data : Dr-Roberto-Martinez026

Date : 11-Jun-2013 14:00

Page: 1

Sample: 1351 Rx-137

Note : -luis-velasco

Inlet : Direct

Ion Mode : FAB+

RT : 2.67 min

Scan#: (9,13)+(4,6)

Elements : C 40/0, H 49/0, O 7/0, N 3/0

Mass Tolerance : 1000ppm, 1mmu if m/z > 1

Unsaturation (U.S.) : 0.0 - 34.0

| Observed m/z  | Int%        |      |    |    |   |   |
|---------------|-------------|------|----|----|---|---|
| 426.1573      | 100.0       |      |    |    |   |   |
| Estimated m/z | Error [ppm] | U.S. | C  | H  | O | N |
| 426.1580      | -1.6        | 17.0 | 26 | 22 | 4 | 2 |

**Figure S15.**  $^1\text{H}$  NMR spectrum of diethyl 2-(3-formyl-5-methyl-1*H*-indol-2-yl)malonate (**6f**).

**6f**,  $^1\text{H}$  NMR (300 MHz,  $\text{CDCl}_3$ )

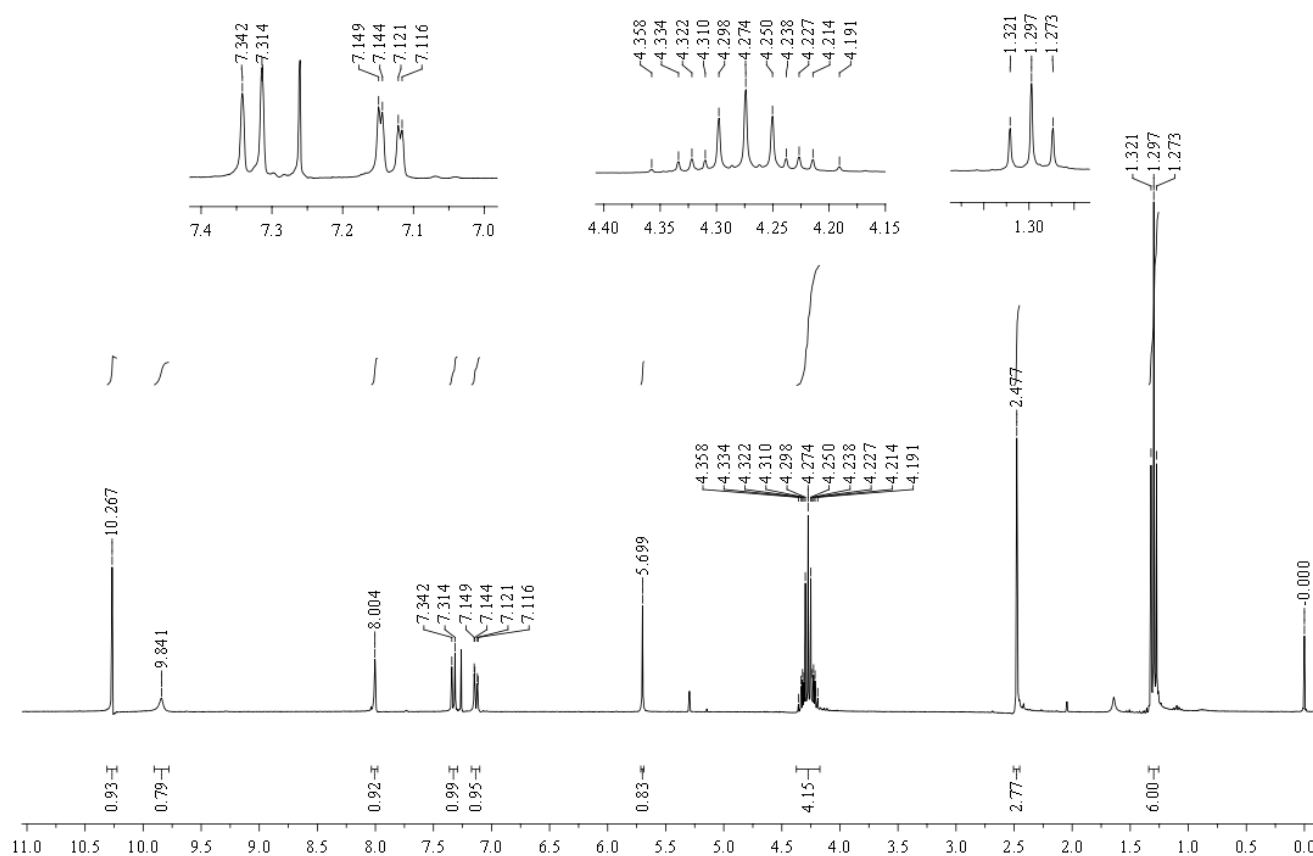

**Figure S16.**  $^{13}\text{C}$  NMR spectrum of diethyl 2-(3-formyl-5-methyl-1*H*-indol-2-yl)malonate (**6f**).**6f**,  $^{13}\text{C}$  NMR (75 MHz,  $\text{CDCl}_3$ )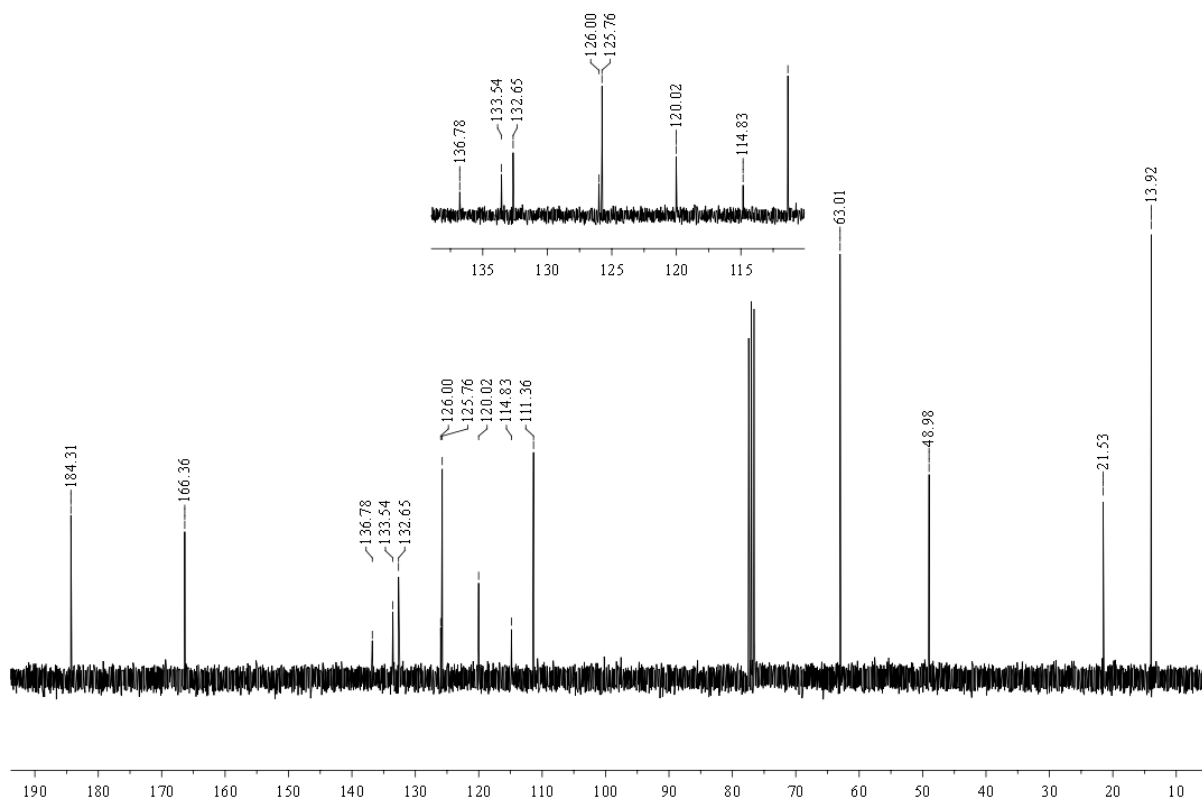**Figure S17.**  $^1\text{H}$  NMR spectrum of methyl 2-(3-formyl-5-methyl-1*H*-indol-2-yl)acetate (**2f**).**2f**,  $^1\text{H}$  NMR (300 MHz,  $\text{CDCl}_3$ )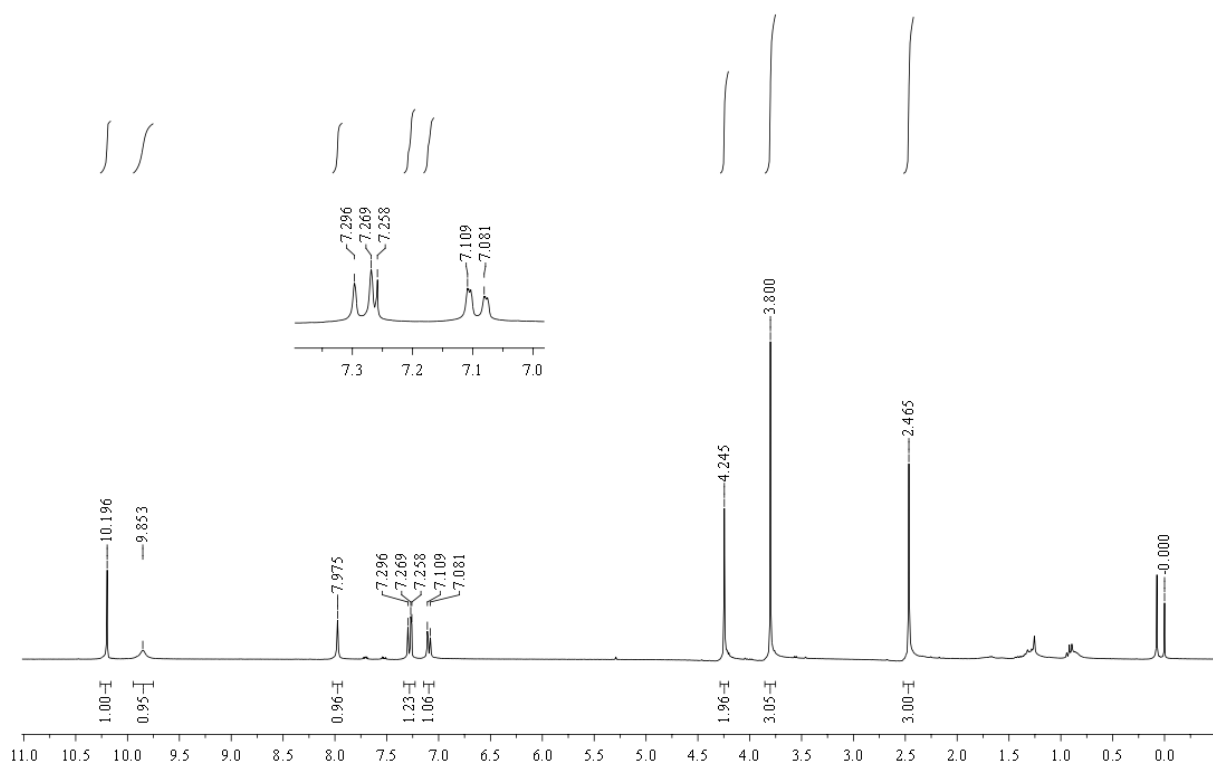

**Figure S18.**  $^{13}\text{C}$  NMR spectrum of methyl 2-(3-formyl-5-methyl-1*H*-indol-2-yl)acetate (**2f**).**2f**,  $^{13}\text{C}$  NMR (75 MHz,  $\text{CDCl}_3$ )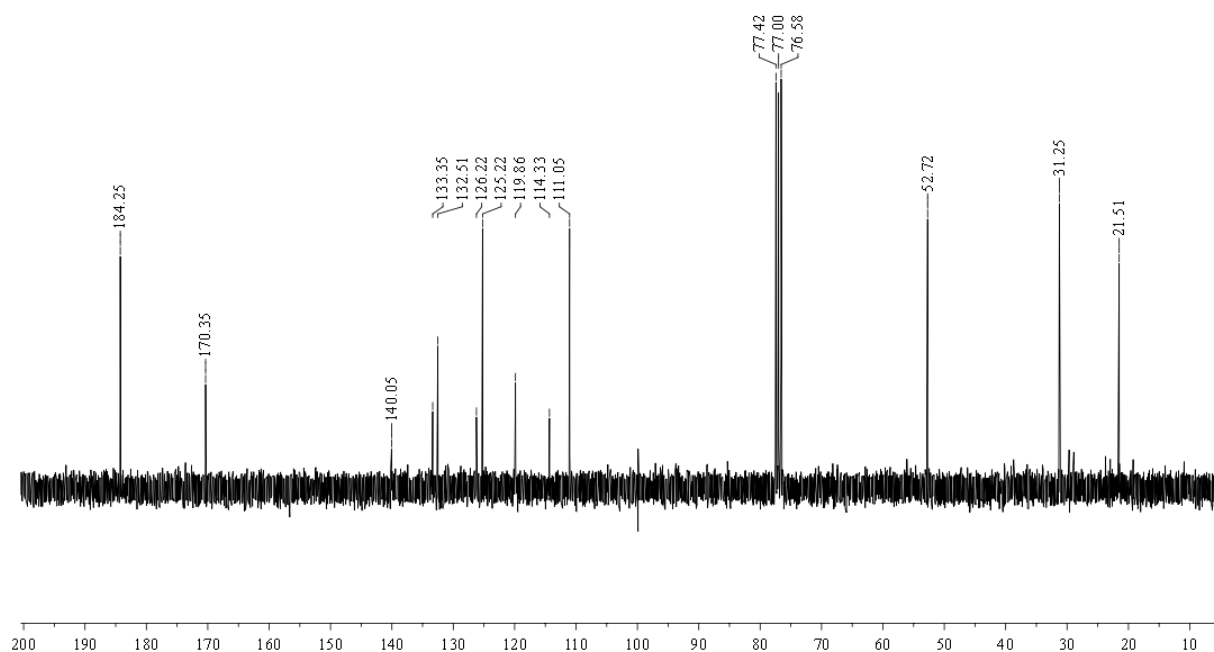**Figure S19.**  $^1\text{H}$  NMR spectrum of 5-methyl-1*H*-indole-3-carbaldehyde (**4f**).**4f**,  $^1\text{H}$  NMR (300 MHz,  $\text{CDCl}_3$ )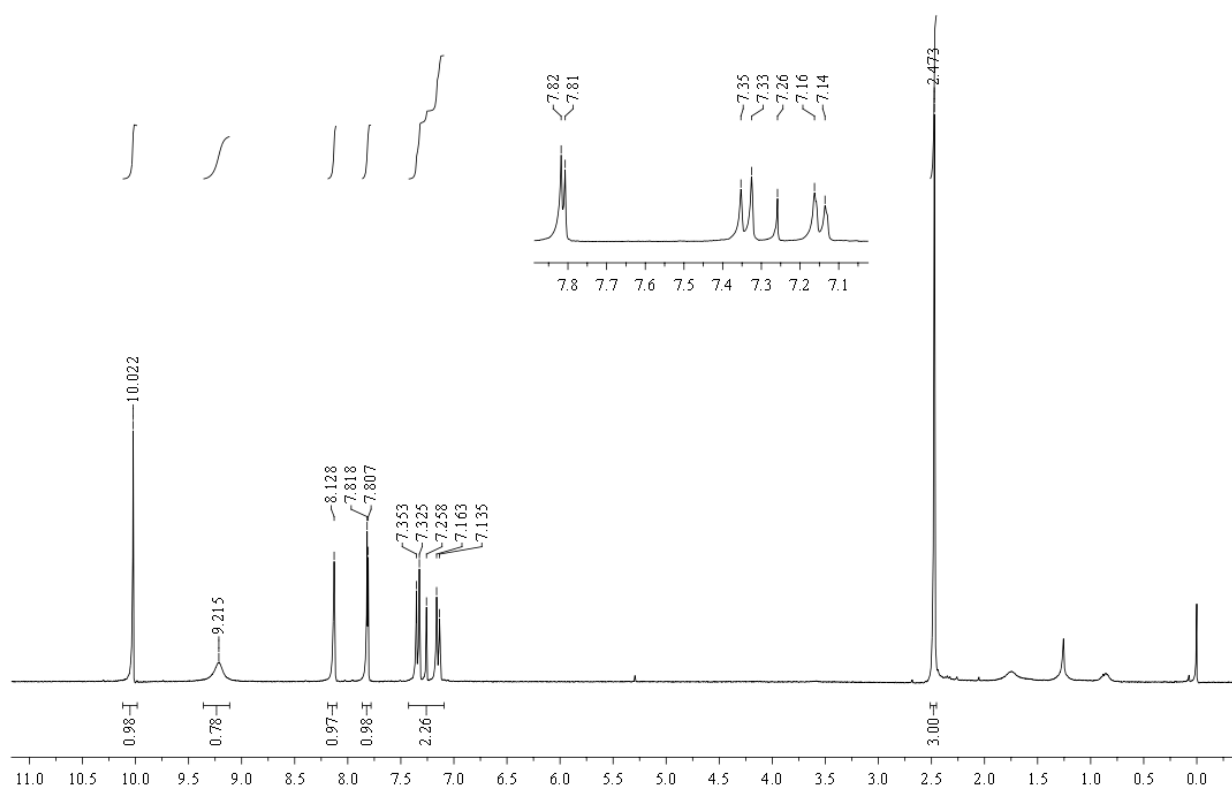

**Figure S20.**  $^1\text{H}$  NMR spectrum of diethyl 2-(ethoxycarbonothioylthio)malonate (**3**).**3**,  $^1\text{H}$  NMR (300 MHz,  $\text{CDCl}_3$ )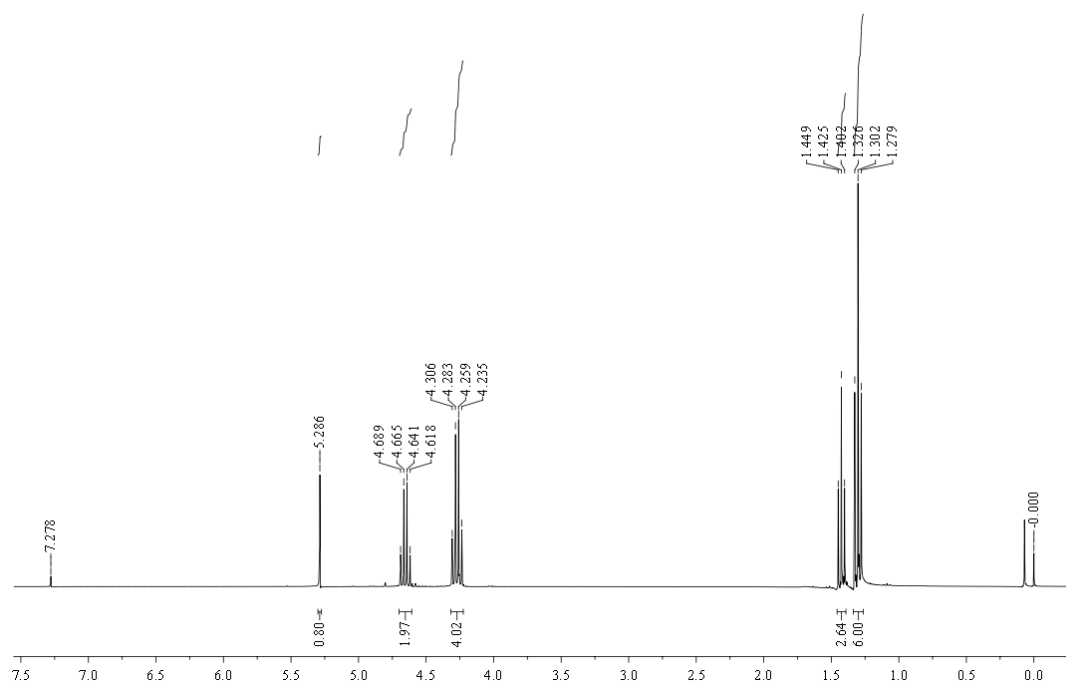**Figure S21.**  $^{13}\text{C}$  NMR spectrum of diethyl 2-(ethoxycarbonothioylthio)malonate (**3**).**3**,  $^{13}\text{C}$  NMR (75 MHz,  $\text{CDCl}_3$ )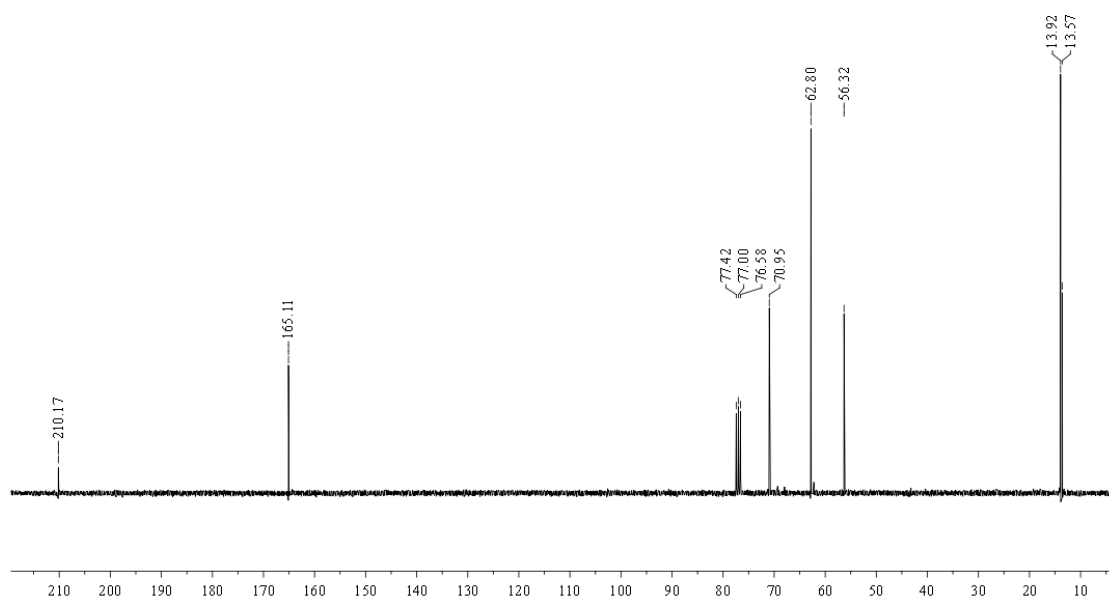

Supplement: Supplementary File 1 — Supplementary Information (PDF, 814 KB) [file marinedrugs-12-01757-s001.pdf]
